# Supplementary material
Source: PubMed Central journal article supplement (PMC2752602)
Supplement: 0904890106_0904890106SI.pdf [file 0904890106_0904890106SI.pdf]

# Supporting Information

Mercier Zuber et al. 10.1073/pnas.0904890106

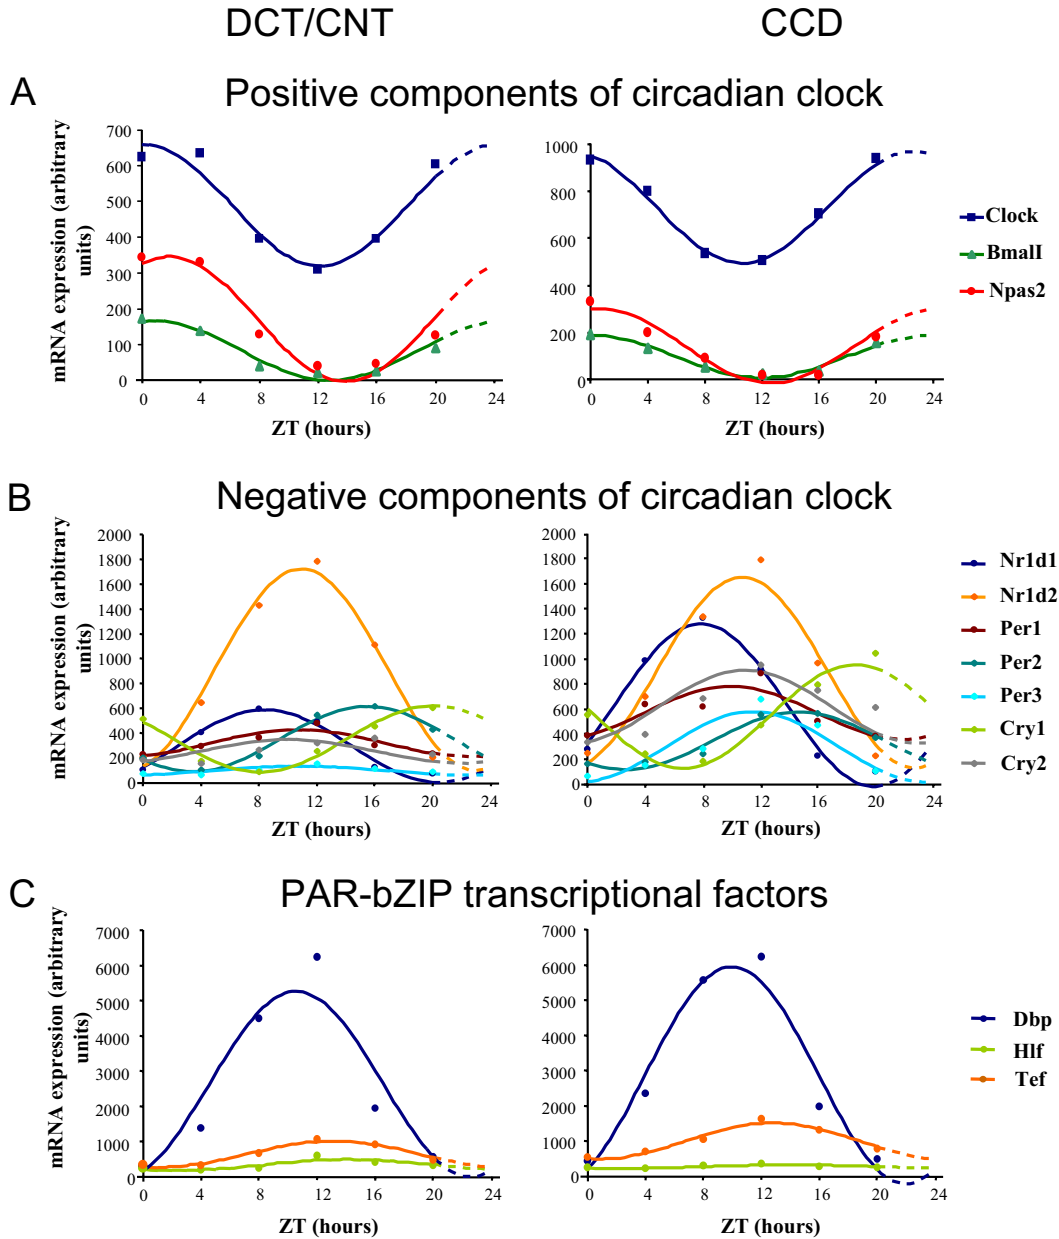

**Fig. S1.** Temporal expression profiles of genes involved in the positive limb of the circadian clock feedback loop (A), the negative limb of the circadian clock feedback loop (B), and the clock-controlled Par bZip transcriptional factors (C). The colored squares show the expression values of circadian transcripts obtained from the microarray hybridization data (arbitrary units). The colored solid lines show fitting of the microarray data to the cosine function.

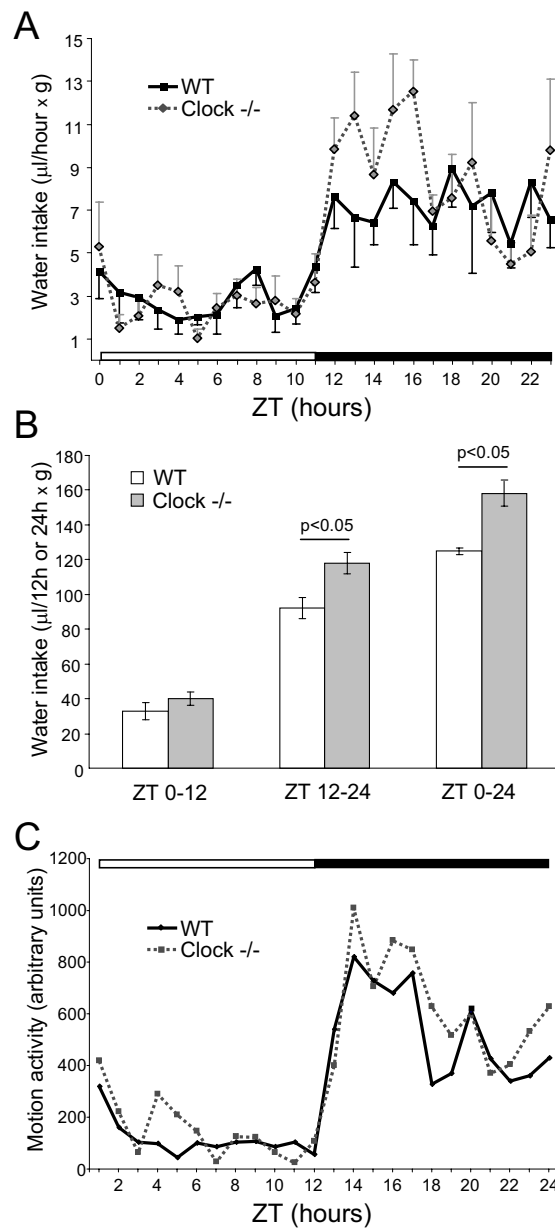

**Fig. S2.** Water intake and general motion activity in wild-type and *clock(-/-)* mice. (A) Discontinuous 24-h measurement of water intake in wild-type mice (solid-line) or *clock(-/-)* mice (dashed mice) integrated on an hourly basis. (B) Water intake in wild-type mice (white bars) or *clock(-/-)* mice (gray bars) during the period of inactivity (ZT0–ZT12), the period of activity (ZT12–ZT24), or over 24 h (ZT0–ZT24). Error bars show SEM. (C) Discontinuous 24-h measurement of general motion activity in wild-type mice (solid-line) or *clock(-/-)* mice (dashed mice) integrated on an hourly basis.

## Other Supporting Information Files

- [Table S1](#)
- [Table S2](#)
- [Table S3](#)
- [Table S4](#)
- [Table S5](#)
- [Table S6](#)
- [Table S7](#)
- [Table S8](#)
